# Supplementary material for: HILIC Separation Methods on Poly-Hydroxyl Stationary Phases for Determination of Common Saccharides with Evaporative Light-Scattering Detector and Rapid Determination of Isomaltulose in Protein-Rich Food Supplements
Source: MDPI journal article supplement (doi:10.3390/separations11020045), 2024-01-30
Supplement: s1 [file s1]

Archive with 2 entries (2 files):
- Supplementary Figure S1. calibrationcurve.pdf
- Supplementary Table S1. sampleinfo.pdf
