# Supplementary material for: HILIC Separation Methods on Poly-Hydroxyl Stationary Phases for Determination of Common Saccharides with Evaporative Light-Scattering Detector and Rapid Determination of Isomaltulose in Protein-Rich Food Supplements
Source: MDPI journal article supplement (doi:10.3390/separations11020045), 2024-01-30
Supplement: s1 [file s1]

Supplementary material to:

Tomáš Crha, Grace F. Odedina and Jiří Pazourek, HILIC Separation Methods on Poly-Hydroxyl Stationary Phases for Determination of Common Saccharides with Evaporative Light-Scattering Detector and Rapid Determination of Isomaltulose in Protein-Rich Food Supplements

Table S1. Links to producers' web pages with compositions of the samples. Access date: 24 January 2024

| Sample name                                       | Web link                                                                                                                                                                                            |
|---------------------------------------------------|-----------------------------------------------------------------------------------------------------------------------------------------------------------------------------------------------------|
| Nutrend Turbo Effect Shot                         | <a href="https://www.nutrend.cz/produkt/turbo-effect-shot-555/10-x-25-ml-bez-prichute">https://www.nutrend.cz/produkt/turbo-effect-shot-555/10-x-25-ml-bez-prichute</a>                             |
| Enervit Pre Sport,<br>jelly orange                | <a href="https://eshop.enervit.cz/enervit-pre-sport-pomeranc-45-g">https://eshop.enervit.cz/enervit-pre-sport-pomeranc-45-g</a>                                                                     |
| Enervit Pre Sport,<br>jelly cranberry             | <a href="https://eshop.enervit.cz/enervit-pre-sport-45-g-brusinka">https://eshop.enervit.cz/enervit-pre-sport-45-g-brusinka</a>                                                                     |
| Amix Nutrition Slow Gel                           | <a href="https://www.amix-nutrition.cz/performance-amix-slow-gel-mango-40g/nutricni-hodnoty">https://www.amix-nutrition.cz/performance-amix-slow-gel-mango-40g/nutricni-hodnoty</a>                 |
| Edgar Powergel, orange                            | <a href="https://www.fitness4u.cz/edgar-powergel-40-g/d86881">https://www.fitness4u.cz/edgar-powergel-40-g/d86881</a>                                                                               |
| Extrifit Regel                                    | <a href="https://www.fitness4u.cz/extrifit-regel-80g/">https://www.fitness4u.cz/extrifit-regel-80g/</a>                                                                                             |
| High5 Energy Drink Slow<br>Release, black currant | <a href="https://www.fitness4u.cz/high5-energy-gel-slow-release-62-g/">https://www.fitness4u.cz/high5-energy-gel-slow-release-62-g/</a>                                                             |
| Penco Ultra Endurance<br>Drink                    | <a href="https://www.penco.cz/en/nutrition-before-activity/-ultra-endurance-drink-1500g-wild-cherry">https://www.penco.cz/en/nutrition-before-activity/-ultra-endurance-drink-1500g-wild-cherry</a> |
| NutriWorks Osmo Worx,<br>neutral                  | <a href="https://www.fitness4u.cz/nutriworks-osmo-worx-1000g/">https://www.fitness4u.cz/nutriworks-osmo-worx-1000g/</a>                                                                             |
| Edgar Powerdrink, apricot                         | <a href="https://www.fitness4u.cz/edgar-powerdrink-600-g">https://www.fitness4u.cz/edgar-powerdrink-600-g</a>                                                                                       |
| Edgar Vegan Powerdrink,<br>kiwi                   | <a href="https://www.fitness4u.cz/edgar-vegan-powerdrink-600-g">https://www.fitness4u.cz/edgar-vegan-powerdrink-600-g</a>                                                                           |
| Nutrend After Training<br>Protein                 | <a href="https://www.fitness4u.cz/nutrend-after-training-protein-540g/">https://www.fitness4u.cz/nutrend-after-training-protein-540g/</a>                                                           |
| Nutrend Compress B.I.G.<br>(protein)              | <a href="https://www.fitness4u.cz/nutrend-compress-b-i-g-2100g/">https://www.fitness4u.cz/nutrend-compress-b-i-g-2100g/</a>                                                                         |
